# Supplementary material for: Flexible and durable wood-based triboelectric nanogenerators for self-powered sensing in athletic big data analytics
Source: PubMed Central journal article supplement (PMC6879608; doi:10.1038/s41467-019-13166-6), 2019-11-26
Supplement: 41467_2019_13166_MOESM3_ESM.pdf [file 41467_2019_13166_MOESM3_ESM.pdf]

## Description of Additional Supplementary Files

1

2

3 File Name: Supplementary Movie 1

4 Description: Illustration of the self-powered falling point distribution statistical system

5

6 File Name: Supplementary Movie 2

7 Description: Demonstration of the self-powered falling point distribution statistical system

8

9 File Name: Supplementary Movie 3

10 Description: High speed camera view of the top edge ball

11

12 File Name: Supplementary Movie 4

13 Description: High speed camera view of the side edge ball

14

15 File Name: Supplementary Movie 5

16 Description: Self-powered edge ball judgement system
